# Supplementary material for: Biodegradation of phenol and catechol in cloud water: Comparison to chemical oxidation in the atmospheric multiphase system
Source: Copernicus journal article supplement (doi:10.5194/acp-2019-1048), 2020-01-13
Supplement: Supplementary file 1 [file acp-2019-1048-supplement.pdf]

## Supporting information

### **Biodegradation of phenol and catechol in cloud water: Comparison to chemical oxidation in the atmospheric multiphase system**

Saly Jaber<sup>1</sup>, Audrey Lallement<sup>1</sup>, Martine Sancelme<sup>1</sup>, Martin Leremboure<sup>1</sup>, Gilles Mailhot<sup>1</sup>,  
Barbara Ervens<sup>1\*</sup> and Anne-Marie Delort<sup>1\*</sup>

<sup>1</sup>Université Clermont Auvergne, CNRS, SIGMA Clermont, Institut de Chimie de Clermont-Ferrand, F-63000  
Clermont-Ferrand, France

*Correspondence to:* Anne-Marie Delort (a-marie.delort@uca.fr) and Barbara Ervens (barbara.ervens@uca.fr)

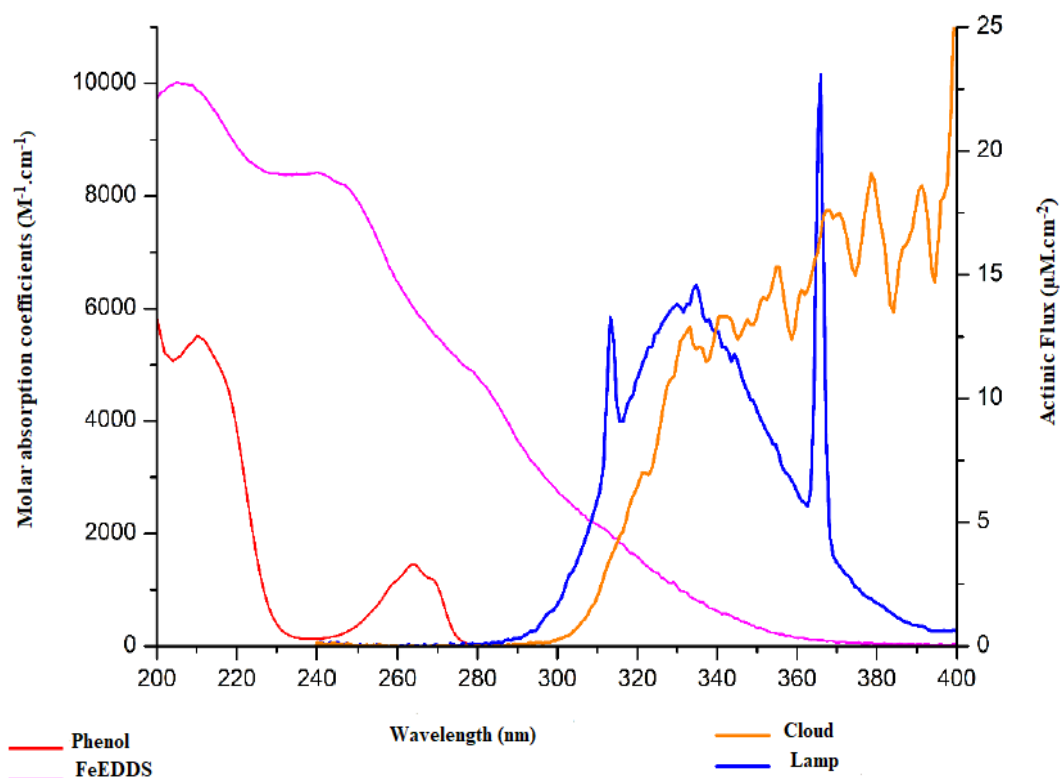

**Figure S-1 :** Comparison of the actinic fluxes of the lamps used and the emission of the solar spectrum measured in-cloud at the puy de Dôme station. The green line represents the actinic flux of the lamp; the brown line corresponds to the actinic flux of the solar emission spectrum. The red line represents the molar absorption coefficient of the Fe-EDDS complex. The blue line represents the molar absorption coefficient of phenol.

## Section S-1 Calculation of the biodegradation rates for the *Pseudomonas* strains

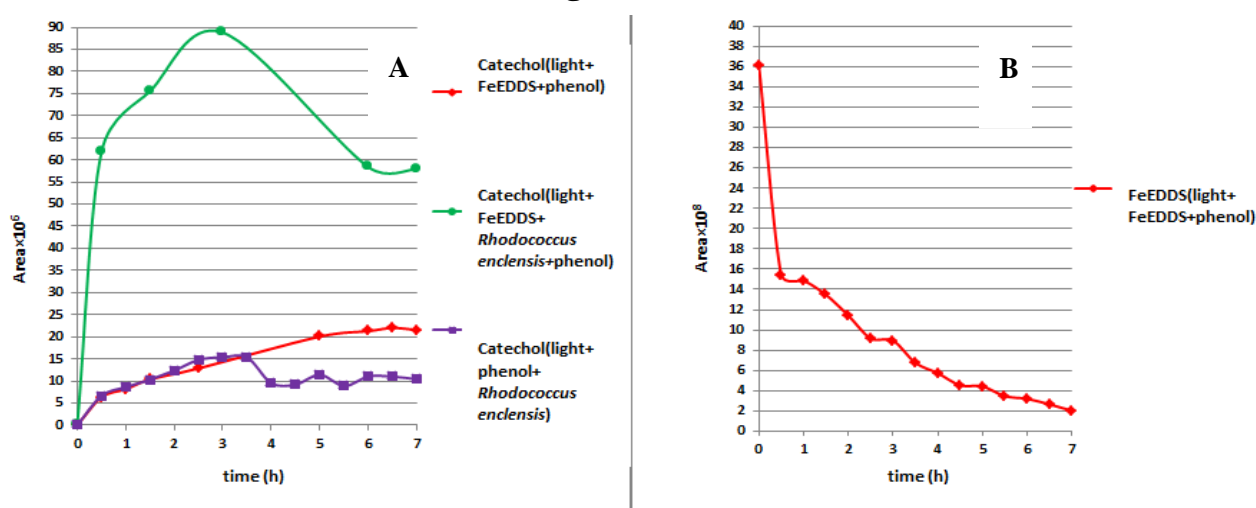

**Figure S-2 :** A) time dependence of the integral of catechol signal ( $m/z = 110.03678$ ) detected in mass spectra of incubations with Fe(EDDS)+light and Phenol (red), Fe(EDDS)+ light, Phenol and *R. enclensis* (green), light + Phenol and *R. enclensis* without Fe(EDDS)(violet). B) Time dependence of the integral of Fe(EDDS) signal ( $m/z = 346.0086$ ) detected in the mass spectrum, recorded during the incubation with Fe(EDDS)+ light and Phenol.

### ***S-1.1 Pseudomonas putida* EKII**

To calculate the biodegradation rate of phenol and catechol by *Pseudomonas putida* EKII, we used the following data from Hinteregger et al. (1992):

**Phenol:** Biodegradation of  $654 \mu\text{mol L}^{-1} \text{ h}^{-1}$ , number of cells:  $3.3 \cdot 10^9 \text{ cell L}^{-1}$

5 **Biodegradation rate of phenol:  $1.98 \cdot 10^{-17} \text{ mol cell}^{-1} \text{ h}^{-1}$**

**Catechol:** Biodegradation rate of catechol is twelve times higher than of phenol (ratio =  $2.4 \mu\text{mol min}^{-1} \text{ mg}^{-1} / 0.2 \mu\text{mol min}^{-1} \text{ mg}^{-1}$ , expressed per mg of cells)

**Biodegradation of catechol:  $1.98 \cdot 10^{-17} \cdot 12 = 23.78 \cdot 10^{-17} \text{ mol cell}^{-1} \text{ h}^{-1}$**

10

### ***S-1.2 Pseudomonas aeruginosa***

To calculate the biodegradation rate of phenol and catechol by *Pseudomonas aeruginosa*, we used the following data from Razika et al. (2010):

**Phenol:** Biodegradation of  $10 \text{ mg L}^{-1}$  during 96 hours, number concentration of cells:  $4.7 \cdot 10^9 \text{ cell L}^{-1}$

15 **Biodegradation rate of phenol:  $23.49 \cdot 10^{-17} \text{ mol cell}^{-1} \text{ h}^{-1}$**

Biodegradation of  $50 \text{ mg L}^{-1}$  during 120 hours, number concentration of cells:  $4.7 \cdot 10^9 \text{ cell L}^{-1}$

**Biodegradation rate of phenol:  $94.31 \cdot 10^{-17} \text{ mol cell}^{-1} \text{ h}^{-1}$**

**Biodegradation rate of phenol (average value) taken into account:  $58.9 \cdot 10^{-17} \text{ mol cell}^{-1} \text{ h}^{-1}$**

20 **Catechol:** No information is available in Razika et al (2010), so we multiplied the biodegradation rates of phenol with a factor of twelve as it is within the same order of magnitude of what we found in our study (Factor ~ 10)

**Biodegradation rate of catechol (average value):  $58.9 \cdot 10^{-17} \text{ mol cell}^{-1} \text{ h}^{-1} \cdot 12 = 706.8 \cdot 10^{-17} \text{ mol cell}^{-1}$ .**

25

## Section S-2: Calculation of photolysis rate $j(\text{Fe(EDDS)})$ and resulting OH concentration in the experiments

$$j = \int_{250}^{400} I_{0,\lambda} \cdot \epsilon_{\lambda} \cdot \phi_{\lambda} \cdot d\lambda \frac{\text{photons}}{\text{cm}^2 \text{ s nm molec cm}} \frac{\text{cm}^3}{\text{nm}} \quad [\text{s}^{-1}]$$

$I_{0,\lambda}$  = spectral actinic flux [photons  $\text{cm}^{-2} \text{s}^{-1} \text{nm}^{-1}$ ]

5  $\epsilon_{\lambda}$  = extinction coefficient [ $\text{cm}^3 \text{molec}^{-1} \text{cm}^{-1}$ ]

$\phi_{\lambda}$  = Quantum yield [dimension less]

### Experimental data

Irradiance  $E(\lambda)$  [ $\mu\text{W cm}^{-2}$ ]; convert into SI units  $E'[\text{W/m}^2] = E \cdot 10^{-6} \text{ W}/\mu\text{W} \cdot 10^4 \text{ cm}^2/\text{m}^2 = E \cdot 0.01$

Convert irradiance  $E(\lambda)$  [ $\mu\text{W cm}^{-2}$ ] to actinic flux  $I$  [photons  $\text{cm}^{-2} \text{s}^{-1}$ ]:

$$10 \quad \text{Actinic flux} \quad I' = \frac{E' \lambda}{h \cdot c} \left[ \frac{\text{W m}}{\text{m}^2} \frac{\text{s}}{\text{J s m}} \right] = \frac{E \lambda}{h \cdot c} \left[ \frac{\text{kg m}^2 \text{m}}{\text{s}^3 \text{m}^2} \frac{\text{s}^2}{\text{kg m}^2 \text{s m}} \frac{\text{s}}{\text{m}} \right] = \frac{\text{photons}}{\text{m}^2 \text{s}}$$

$$\text{Spectral actinic flux} \quad I_{\lambda} = \frac{I'}{\lambda} \cdot 10^{-4} = \frac{E(\lambda)}{h \cdot c} \left[ \frac{\text{W}}{\text{m}^2} \frac{\text{s}}{\text{J s m}} \right] = \frac{E \lambda}{h \cdot c} \left[ \frac{\text{kg m}^2 \text{m}}{\text{s}^3 \text{m}^2} \frac{\text{s}^2}{\text{kg m}^2 \text{s m}} \frac{\text{s}}{\text{m}} \right] = \frac{\text{photons}}{\text{cm}^2 \text{s nm}}$$

$$h = 6.62606 \times 10^{-34} \text{ J s}$$

$$c = 3 \cdot 10^8 \text{ m/s}$$

$\epsilon'$  molar absorption coefficient ( $\text{L mol}^{-1} \text{cm}^{-1}$ ) = extinction coefficient

$$15 \quad \epsilon_{\lambda} = \epsilon' \frac{\text{L}}{\text{mol cm}} \cdot \frac{1000 \text{ cm}^3}{\text{L}} \cdot \frac{\text{mol}}{6.022 \times 10^{23} \text{ molec}} = \epsilon' \cdot 1000/N_A [\text{cm}^3 \text{molec}^{-1} \text{cm}^{-1}]$$

Quantum yield:  $\phi_{\lambda} = 0.025$  (at  $290 < \lambda < 400 \text{ nm}$ )

$$j = \int_{250}^{400} I_{\lambda} \cdot \epsilon_{\lambda} \cdot \phi_{\lambda} \cdot d\lambda \frac{\text{photons}}{\text{cm}^2 \text{s nm molec cm}} \frac{\text{cm}^3}{\text{nm}} = \mathbf{0.001388 \text{ s}^{-1}}$$

### 20 Calculation of steady-state References: $\bullet\text{OH}(\text{aq})$ concentration

#### OH formation:

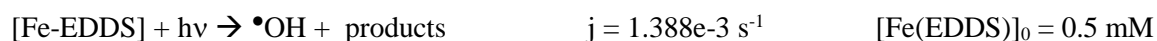

$$- \frac{d[\text{Fe(EDDS)}]}{dt} = \frac{d[\text{OH}]}{dt} = j [\text{Fe(EDDS)}]$$

#### $\bullet\text{OH}$ loss

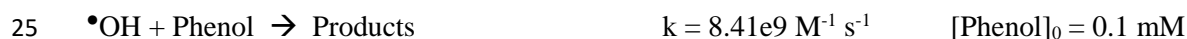

$$\frac{d[\text{OH}]}{dt} = -k [\text{OH}][\text{Phenol}]$$

→ Steady-state OH concentration at the beginning of experiment

$$k [\bullet\text{OH}] [\text{Phenol}] = j [\text{Fe(EDDS)}]$$

$$[\text{OH}] = \frac{j [\text{Fe(EDDS)}]}{k [\text{Phenol}]} = \frac{1.388 \times 10^{-3} \text{ s}^{-1} \cdot 5 \times 10^{-4} \text{ M}}{8.41 \times 10^9 \text{ M}^{-1} \text{s}^{-1} \cdot 1 \times 10^{-4} \text{ M}} = 8.3 \times 10^{-13} \text{ M}$$

## Section S-3: Input data to the multiphase box model

### S-3.1: Multiphase processes

**Table S-1:** Chemical and microbial processes in the multiphase model

| Gas Phase                                                                                |                                                              |                                                                                                                                                                                                     |                 |                                                                    |
|------------------------------------------------------------------------------------------|--------------------------------------------------------------|-----------------------------------------------------------------------------------------------------------------------------------------------------------------------------------------------------|-----------------|--------------------------------------------------------------------|
|                                                                                          | Chemical rate constant<br>[cm <sup>3</sup> s <sup>-1</sup> ] | Reference                                                                                                                                                                                           |                 |                                                                    |
| •OH + Phenol → 0.5 Catechol + 0.5 Prod <sup>a)</sup>                                     | 2.81·10 <sup>-11</sup>                                       | (Berndt and Böge, 2001)                                                                                                                                                                             |                 |                                                                    |
| NO <sub>3</sub> • + Phenol → Products                                                    | 5.8·10 <sup>-12</sup>                                        | (Bolzacchini et al., 2001)                                                                                                                                                                          |                 |                                                                    |
| •OH + Catechol → Products                                                                | 1.1·10 <sup>-10</sup>                                        | (Olariu et al., 2000)                                                                                                                                                                               |                 |                                                                    |
| NO <sub>3</sub> • + Catechol → Products                                                  | 9.8·10 <sup>-11</sup>                                        | (Olariu et al., 2004)                                                                                                                                                                               |                 |                                                                    |
| Aqueous phase                                                                            |                                                              |                                                                                                                                                                                                     |                 |                                                                    |
|                                                                                          | Chemical rate constant<br>[M <sup>-1</sup> s <sup>-1</sup> ] |                                                                                                                                                                                                     |                 |                                                                    |
| •OH + Phenol → 0.5 Catechol + 0.5 Prod <sup>b)</sup>                                     | 8.41·10 <sup>9</sup>                                         | (Raghavan and Steenken, 1980)                                                                                                                                                                       |                 |                                                                    |
| NO <sub>3</sub> • + Phenol → Products                                                    | 1.9·10 <sup>9</sup>                                          | (Umschlag et al., 2002)                                                                                                                                                                             |                 |                                                                    |
| •OH + Catechol → Products                                                                | 4.7·10 <sup>9</sup>                                          | (Hoffmann et al., 2018)                                                                                                                                                                             |                 |                                                                    |
| NO <sub>3</sub> • + Catechol → Products                                                  | 1.9·10 <sup>9</sup>                                          | (Hoffmann et al., 2018)                                                                                                                                                                             |                 |                                                                    |
| •OH + WSOC → Products                                                                    | 2·10 <sup>6</sup> s <sup>-1</sup>                            | Based on (Arakaki et al., 2013), assuming [WSOC] = 5 mM                                                                                                                                             |                 |                                                                    |
| NO <sub>3</sub> → Products                                                               | 10 <sup>5</sup> s <sup>-1</sup>                              | Based on (Exner et al., 1992; Zellner and Herrmann, 1994); assuming 1 mM Cl <sup>-</sup> , 0.01 mM Br <sup>-</sup>                                                                                  |                 |                                                                    |
| The following three reactions are only considered in sensitivity simulations, Figure S-4 |                                                              |                                                                                                                                                                                                     |                 |                                                                    |
| O <sub>3</sub> + Phenol → Products                                                       | 1300                                                         | (Hoigné and Bader, 1983)                                                                                                                                                                            |                 |                                                                    |
| O <sub>3</sub> + Catechol → Products                                                     | 3.1·10 <sup>5</sup>                                          | (Gurol and Nekouinaini, 1984)                                                                                                                                                                       |                 |                                                                    |
| HO <sub>2</sub> •/O <sub>2</sub> • + Catechol → Products                                 | 7.8·10 <sup>4</sup>                                          | Rate constant for HO <sub>2</sub> /O <sub>2</sub> • ratio at pH = 4 (pK <sub>a</sub> (HO <sub>2</sub> •) = 4.8) calculated based on k <sub>HO2</sub> , k <sub>O2•</sub> - by (Bielski et al., 1985) |                 |                                                                    |
|                                                                                          |                                                              | Microbial rate constant<br>[L cell <sup>-1</sup> s <sup>-1</sup> ]                                                                                                                                  |                 |                                                                    |
| <i>Rhodococcus</i> + Phenol → Catechol                                                   |                                                              | 1.8·10 <sup>-13</sup>                                                                                                                                                                               | d)              |                                                                    |
| <i>Rhodococcus</i> + Catechol → Products                                                 |                                                              | 1.5·10 <sup>-12</sup>                                                                                                                                                                               | d)              |                                                                    |
| <i>Pseudomonas</i> + Phenol → Catechol                                                   |                                                              | 1·10 <sup>-13</sup>                                                                                                                                                                                 | d)              |                                                                    |
| <i>Pseudomonas</i> + Catechol → Prod                                                     |                                                              | 1.2·10 <sup>-12</sup>                                                                                                                                                                               | d)              |                                                                    |
| Phase transfer processes                                                                 |                                                              |                                                                                                                                                                                                     |                 |                                                                    |
|                                                                                          | K <sub>H</sub><br>[M atm <sup>-1</sup> ]                     | Reference                                                                                                                                                                                           | α <sup>c)</sup> | D <sub>g</sub><br>[cm <sup>2</sup> s <sup>-1</sup> ] <sup>c)</sup> |
| •OH(aq) ↔ •OH(gas)                                                                       | 25                                                           | (Klänning et al., 1985)                                                                                                                                                                             | 0.05            | 0.15                                                               |
| NO <sub>3</sub> •(aq) ↔ NO <sub>3</sub> •(gas)                                           | 0.6                                                          | (Rudich et al., 1996)                                                                                                                                                                               | 0.1             | 0.1                                                                |
| Phenol(aq) ↔ Phenol(gas)                                                                 | 647                                                          | (Feigenbrugel et al., 2004)                                                                                                                                                                         | 0.027           | 0.09                                                               |
| Catechol(aq) ↔ Catechol(gas)                                                             | 8.31·10 <sup>5</sup>                                         | (Sander, 2015)                                                                                                                                                                                      | 0.1             | 0.08                                                               |

<sup>a)</sup> Catechol yield likely represents an upper estimate for the total of all dihydroxybenzene compounds <sup>b)</sup> Initial formation of the phenoxy radical and the subsequent reaction with O<sub>2</sub> are lumped here, leading to 0.5 catechol into one step since the second reaction is diffusion controlled; <sup>c)</sup> These values were taken from CAPRAM (Ervens et al., 2003; Hoffmann et al., 2018) <sup>d)</sup> See calculation of values in Section S-3.2

### S-3.2 Calculation of microbial rate constants from experimentally derived rates

Experimentally-derived rates  $R$  of microbial activity towards phenol and catechol are summarized in Table 2 of the main part of the manuscript, together with the bacteria type (*Rhodococcus*, *Pseudomonas putida*, *Pseudomonas aeruginosa*) and aqueous phase concentrations of substrate (phenol, catechol) and bacteria cells. Strictly, the measured rates might be only valid for the same substrate-to-cell ratio as the substrate availability determines the cell activity. Since these concentrations differ greatly, we derive the first-order rate constant  $k'$  [ $\text{h}^{-1}$ ]

$$k' = R [\text{Cell}] / [\text{Substrate}] \quad (\text{S-1})$$

Ambient cell concentrations in cloud water are on the order of  $10^6 - 10^8 \text{ cell L}^{-1}$ . We assume a total cell concentration of  $6.8 \cdot 10^7 \text{ cell L}^{-1}$  of which 3.6% are *Rhodococcus* ( $C_{\text{Rh,cloud}} = 2.7 \cdot 10^6 \text{ cell L}^{-1}$ ) and 19.5% *Pseudomonas* ( $C_{\text{Ps,cloud}} = 1.3 \cdot 10^7 \text{ cell L}^{-1}$ ). Phenol concentrations in cloud water are in the range of 5.5 - 7.7 nM (Lebedev et al., 2018). Using the lower value of this range yields phenol-to-cell ratios in cloud water of  $2 \cdot 10^{-15} \text{ mol cell}^{-1}$  and  $4.2 \cdot 10^{-16} \text{ mol cell}^{-1}$  for *Rhodococcus* and *Pseudomonas*, respectively, which is within two orders of magnitude of the ratios as used in the experiments. Corresponding cloud water measurements for catechol are not available.

In the multiphase model, we describe the microbial processes analogous to chemical reactions, i.e. with a formal second-order rate constant in units of  $\text{L cell}^{-1} \text{ s}^{-1}$  using the constant cell concentrations in the aqueous phase.

$$k_{2\text{nd}} [\text{L cell}^{-1} \text{ s}^{-1}] = k' / [\text{Cell}]_{\text{cloud}} / 3600 \text{ s h}^{-1} \quad (\text{S-2})$$

The resulting  $k_{2\text{nd}}$  are then used in the model studies for the assumed (constant) cell concentrations in cloud water

**Table S-2:** Summary of literature data on microbial activity towards phenol and catechol by *Rhodococcus* and *Pseudomonas*. For the estimates of unknown rates, refer to Section 3.2 (Comparison to literature data) in the main part of the manuscript

| Substrate | Bacteria type                   | R<br>/ mol cell <sup>-1</sup> h <sup>-1</sup> | [Substrate]<br>/ M    | [Cell] <sub>experiment</sub><br>/ (cell L <sup>-1</sup> ) | Ref | [Substrate]/<br>[Cell]<br>/ mol cell <sup>-1</sup> | k'<br>/ h <sup>-1</sup> | [Cell] <sub>cloud</sub> | k <sub>2nd</sub><br>/ L cell <sup>-1</sup> s <sup>-1</sup> |
|-----------|---------------------------------|-----------------------------------------------|-----------------------|-----------------------------------------------------------|-----|----------------------------------------------------|-------------------------|-------------------------|------------------------------------------------------------|
| Phenol    | <i>Rhodococcus</i>              | 1.76·10 <sup>-16</sup>                        | 10 <sup>-4</sup>      | 10 <sup>9</sup>                                           | a   | 10 <sup>-13</sup>                                  | 1.76·10 <sup>-3</sup>   | 2.7·10 <sup>6</sup>     | 1.8·10 <sup>-13</sup>                                      |
| Catechol  | <i>Rhodococcus</i>              | 1.5·10 <sup>-15</sup>                         | 10 <sup>-4</sup>      | 10 <sup>9</sup>                                           | b   | 10 <sup>-13</sup>                                  | 1.5·10 <sup>-2</sup>    | 2.7·10 <sup>6</sup>     | 1.5·10 <sup>-12</sup>                                      |
| Phenol    | <i>Pseudomonas putida</i>       | 1.99·10 <sup>-17</sup>                        | 6.54·10 <sup>-4</sup> | 3.3·10 <sup>9</sup>                                       | c   | 2·10 <sup>-13</sup>                                | 1·10 <sup>-4</sup>      |                         |                                                            |
| Catechol  | <i>Pseudomonas putida</i>       | 2.39·10 <sup>-16</sup>                        |                       |                                                           | c   |                                                    | 2.4·10 <sup>-3</sup>    |                         |                                                            |
| Phenol    | <i>Pseudomonas</i>              | 2.35·10 <sup>-16</sup>                        | 1.06·10 <sup>-4</sup> | 4.7·10 <sup>9</sup>                                       | d   | 2.3·10 <sup>-14</sup>                              | 1·10 <sup>-2</sup>      |                         |                                                            |
|           | <i>aeruginosa</i>               | 9.43·10 <sup>-16</sup>                        | 5.31·10 <sup>-4</sup> | 4.7·10 <sup>9</sup>                                       |     | 1.1·10 <sup>-13</sup>                              | 8.3·10 <sup>-3</sup>    |                         |                                                            |
| Catechol  | <i>Pseudomonas</i>              |                                               |                       |                                                           | e   |                                                    | 0.11                    |                         |                                                            |
|           | <i>aeruginosa</i>               |                                               |                       |                                                           |     |                                                    |                         |                         |                                                            |
| Phenol    | <i>Pseudomonas</i><br>(Average) |                                               |                       |                                                           |     |                                                    | 5·10 <sup>-3</sup>      | 1.3·10 <sup>7</sup>     | 1·10 <sup>-13</sup>                                        |
| Catechol  | <i>Pseudomonas</i><br>(Average) |                                               |                       |                                                           |     |                                                    |                         | 1.3·10 <sup>7</sup>     | 1.2·10 <sup>-12</sup>                                      |

<sup>a)</sup> (Lallement et al., 2018), <sup>b)</sup> This study, <sup>c)</sup> (Hinteregger et al., 1992) <sup>d)</sup> (Razika et al., 2010), <sup>e)</sup> Scaled up from data for phenol by reference <sup>d)</sup> using the same ratio of activities to phenol and catechol

(12) as for the average value for *Pseudomonas putida*

## Section S-4: Model sensitivity study including the aqueous phase reactions of phenol with ozone and of catechol with ozone and $\text{HO}_2^\bullet/\text{O}_2^\bullet$

In a recent model study by (Hoffmann et al., 2018), it was suggested that catechol (and other dihydroxybenzenes) are efficiently oxidized not only by  $\bullet\text{OH}$  but also by ozone and the hydroperoxy ( $\text{HO}_2^\bullet/\text{O}_2^\bullet$ ) radical. Also the reaction of phenol with ozone was included in this model study. In that latter model study, a rate constant of  $k(\text{O}_3 + \text{Catechol}) = 5.2 \cdot 10^5 \text{ M}^{-1} \text{ s}^{-1}$  was estimated. This rate constant is similar to an experimentally-derived value of  $k(\text{O}_3 + \text{Catechol}) = 3.1 \cdot 10^5 \text{ M}^{-1} \text{ s}^{-1}$  (Gurol and Nekouinaini, 1984). This latter study was performed at very acidic conditions ( $\text{pH} = 1.5$ ) and a strong pH dependence of the rate constant was pointed out leading to a decreasing rate constant with increasing pH and resulting in the predominance of the  $\bullet\text{OH}$  reaction at atmospherically-relevant pH values ( $\sim 5$ ).

Since the exact pH dependence is not available, we show in the following model results from a sensitivity studies including the  $\text{HO}_2^\bullet$  and  $\text{O}_3$  reactions in order to provide an upper estimate of their role in the multiphase system. Initial concentrations of 0.1 ppt  $\text{HO}_2^\bullet$  and 40 ppb ozone in the gas phase are assumed and held constant throughout the simulation. In agreement with the model results by Hoffmann et al. (2018), we find large contributions of the ozone reactions in the aqueous phase to the total loss. The relative contributions of the ozone (57 – 68%) and  $\text{HO}_2^\bullet/\text{O}_2^\bullet$  (16 – 19%) reactions with catechol predicted here are also similar as predicted in the previous model study.

### S-4.2 Model results

All model results [relative contribution to total loss [%]] are summarized in Table S-3. The upper part of the table contains results for the base simulations as shown in Figure 4 (microbial aqueous phase processes and  $\bullet\text{OH}$  and  $\text{NO}_3^\bullet$  reactions in gas and aqueous phases); the bottom part of the table includes results for the sensitivity simulations that also include  $\text{HO}_2^\bullet(\text{aq})$  and  $\text{O}_3(\text{aq})$  reactions (Figure S-3).

**Table S-3: Model results of base case and sensitivity simulations: Relative contributions to total loss of phenol and catechol, respectively**

|                                                                                                                                                                          |          | $\bullet\text{OH}(\text{g})$ | $\text{NO}_3^\bullet(\text{g})$ | $\bullet\text{OH}(\text{aq})$ | $\text{NO}_3^\bullet(\text{aq})$ | $\text{O}_3(\text{aq})$ | $\text{HO}_2^\bullet(\text{aq})$ | <i>Rhodo-</i><br><i>coccus</i> | <i>Pseudo-</i><br><i>monas</i> |
|--------------------------------------------------------------------------------------------------------------------------------------------------------------------------|----------|------------------------------|---------------------------------|-------------------------------|----------------------------------|-------------------------|----------------------------------|--------------------------------|--------------------------------|
| <b>Base case</b>                                                                                                                                                         |          |                              |                                 |                               |                                  |                         |                                  |                                |                                |
| Day                                                                                                                                                                      | Phenol   | 99.8                         | 0                               | 0.22                          | 0                                | -                       | -                                | 0.01                           | 0.006                          |
|                                                                                                                                                                          | Catechol | 69.3                         | 0                               | 14                            | 0                                | -                       | -                                | 9.3                            | 7.4                            |
| Night                                                                                                                                                                    | Phenol   | 0                            | 99.8                            | 0                             | 0.18                             | -                       | -                                | 0.0005                         | 0.00027                        |
|                                                                                                                                                                          | Catechol | 0                            | 97.5                            | 0                             | 2.2                              | -                       | -                                | 0.18                           | 0.14                           |
| <b>Sensitivity simulation including aqueous phase reactions of <math>\text{O}_3</math> (phenol, catechol) and <math>\text{HO}_2/\text{O}_2^\bullet</math> (catechol)</b> |          |                              |                                 |                               |                                  |                         |                                  |                                |                                |
| Day                                                                                                                                                                      | Phenol   | 99.7                         | 0                               | 0.22                          | 0                                | 0.02                    | 0                                | 0.01                           | 0.0056                         |
|                                                                                                                                                                          | Catechol | 6.1                          | 0                               | 1.2                           | 0                                | 58.9                    | 33                               | 0.81                           | 0.65                           |
| Night                                                                                                                                                                    | Phenol   | 0                            | 99.8                            | 0                             | 0.18                             | 0.0007                  | 0                                | 0.0005                         | 0.00027                        |
|                                                                                                                                                                          | Catechol | 0                            | 86.4                            | 0                             | 2                                | 11.4                    | 0                                | 0.16                           | 0.13                           |



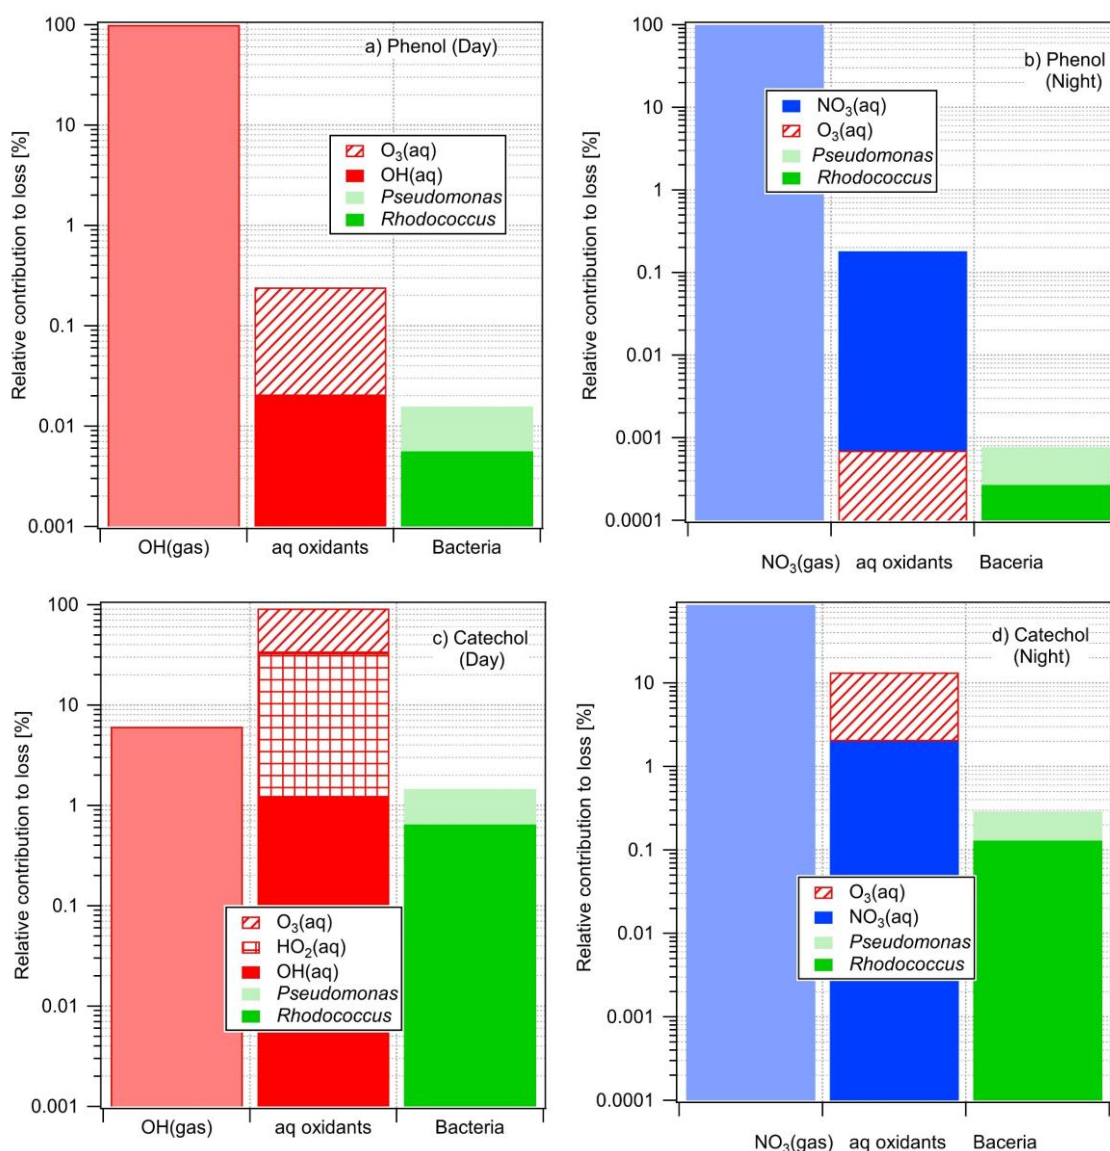

**Figure S- 3 :** Relative contributions to total loss of phenol (a, b) and catechol (c, d) in the multiphase system including  $\text{HO}_2^\bullet$  and  $\text{O}_3$  reactions in the aqueous phase (Table S-3).

## References

- Arakaki, T., Anastasio, C., Kuroki, Y., Nakajima, H., Okada, K., Kotani, Y., Handa, D., Azechi, S., Kimura, T., Tsuchioka, A. and Miyagi, Y.: A general scavenging rate constant for reaction of hydroxyl radical with organic carbon in atmospheric waters, *Env. Sci Technol*, 47(15), 8196–8203, doi:10.1021/es401927b, 2013.
- Berndt, T. and Böge, O.: Gas-phase reaction of OH radicals with benzene: products and mechanism, *Phys. Chem. Chem. Phys.*, 3(22), 4946–4956, 2001.
- Bielski, B. H. J., Cabell, D. E., Arudi, R. L. and Ross, A., . B.: Reactivity of  $\text{HO}_2/\text{O}_2$ - radicals in aqueous solution, *J Phys Chem Ref Data*, 14(4), 1041–1100, 1985.
- Bolzacchini, E., Bruschi, M., Hjorth, J., Meinardi, S., Orlandi, M., Rindone, B. and Rosenbohm, E.: Gas-Phase Reaction of Phenol with  $\text{NO}_3$ , *Environ. Sci. Technol.*, 35(9), 1791–1797, doi:10.1021/es001290m, 2001.
- Ervens, B., George, C., Williams, J. E., Buxton, G. V., Salmon, G. A., Bydder, M., Wilkinson, F., Dentener, F., Mirabel, P., Wolke, R. and Herrmann, H.: CAPRAM2.4 (MODAC mechanism): An extended and condensed

- tropospheric aqueous phase mechanism and its application, *J Geophys Res*, 108(D14), 4426, doi:doi:10.1029/2002JD002202, 2003.
- Exner, M., Herrmann, H. and Zellner, R.: Laser-based studies of reactions of the nitrate radical in aqueous solution, *Berichte Bunsenges Phys Chem*, 96, 470–477, 1992.
- 5 Feigenbrugel, V., Le Calvé, S., Mirabel, P. and Louis, F.: Henry's law constant measurements for phenol, o-, m-, and p-cresol as a function of temperature, *Atmos. Environ.*, 38(33), 5577–5588, doi:10.1016/j.atmosenv.2004.06.025, 2004.
- Gurol, M. D. and Nekouinaini, S.: Kinetic behavior of ozone in aqueous solutions of substituted phenols, *Ind. Eng. Chem. Fundam.*, 23(1), 54–60, doi:10.1021/i100013a011, 1984.
- 10 Hinteregger, C., Leitner, R., Loidl, M., Ferschl, A. and Streichsbier, F.: Degradation of phenol and phenolic compounds by *Pseudomonas putida* EKII, *Appl. Microbiol. Biotechnol.*, 37(2), 252–259, doi:10.1007/BF00178180, 1992.
- Hoffmann, E. H., Tilgner, A., Wolke, R., BÄllge, O., Walter, A. and Herrmann, H.: Oxidation of substituted aromatic hydrocarbons in the tropospheric aqueous phase: kinetic mechanism development and modelling, *Phys. Chem. Chem. Phys.*, 20(16), 10960–10977, doi:10.1039/C7CP08576A, 2018.
- 15 Hoigné, J. and Bader, H.: Rate constants of reactions of ozone with organic and inorganic compounds in water—I: Non-dissociating organic compounds, *Water Res.*, 17(2), 173–183, doi:10.1016/0043-1354(83)90098-2, 1983.
- Kläning, U. K., Sehested, K. and Holcman, J.: Standard Gibbs energy of formation of the hydroxyl radical in aqueous solution. Rate constants for the reaction  $\text{ClO}_2^- + \text{O}_3 = \text{O}_3^- + \text{ClO}_2$ , *J Phys Chem*, 89, 760–763, 1985.
- 20 Lallement, A., Besaury, L., Tixier, E., Sancelme, M., Amato, P., Vinatier, V., Canet, I., Polyakova, O. V., Artaev, V. B., Lebedev, A. T., Deguillaume, L., Mailhot, G. and Delort, A.-M.: Potential for phenol biodegradation in cloud waters, *Biogeosciences*, 15(18), 5733–5744, doi:10.5194/bg-15-5733-2018, 2018.
- Lebedev, A. T., Polyakova, O. V., Mazur, D. M., Artaev, V. B., Canet, I., Lallement, A., Väitilingom, M., Deguillaume, L. and Delort, A.-M.: Detection of semi-volatile compounds in cloud waters by GC×GC-TOF-MS.
- 25 Evidence of phenols and phthalates as priority pollutants, *Environ. Pollut.*, 241, 616–625, doi:10.1016/j.envpol.2018.05.089, 2018.
- Olariu, R. I., Barnes, I., Becker, K. H. and Klotz, B.: Rate coefficients for the gas-phase reaction of OH radicals with selected dihydroxybenzenes and benzoquinones, *Int. J. Chem. Kinet.*, 32(11), 696–702, doi:10.1002/1097-4601(2000)32:11<696::AID-KIN5>3.0.CO;2-N, 2000.
- 30 Olariu, R. I., Bejan, I., Barnes, I., Klotz, B., Becker, K. H. and Wirtz, K.: Rate Coefficients for the Gas-Phase Reaction of NO<sub>3</sub> Radicals with Selected Dihydroxybenzenes, *Int. J. Chem. Kinet.*, 577–583, 2004.
- Razika, B., Abbes, B., Messaoud, C. and Soufi, K.: Phenol and Benzoic Acid Degradation by *Pseudomonas aeruginosa*, *J. Water Resour. Prot.*, 788–791, 2010.
- Rudich, Y., Talukdar, R. K., Fox, R. W. and Ravishankara, A. R.: Reactive Uptake of NO<sub>3</sub> on pure Water and Ionic Solutions, *J Geophys Res*, 101, 21023–21031, 1996.
- 35 Sander, R.: Compilation of Henry's law constants (version 4.0) for water as solvent, *Atmos Chem Phys*, 15(8), 4399–4981, doi:10.5194/acp-15-4399-2015, 2015.
- Umschlag, T., Zellner, R. and Herrmann, H.: Laser-based studies of NO<sub>3</sub> radical reactions with selected aromatic compounds in aqueous solution, *Phys Chem Chem Phys*, 4, 2975–2982, 2002.
- 40 Zellner, R. and Herrmann, H.: Free Radical Chemistry of the Aqueous Atmospheric Phase, in *Advances in Spectroscopy*, vol. 24, edited by R. J. H. Clark and R. E. Hester, pp. 381–451, Wiley, London., 1994.
